# Supplementary material
Source: PubMed Central journal article supplement (PMC6116510)
Supplement: NIHMS985762-supplement-Supplemental_Figures_and_tables.pdf [file NIHMS985762-supplement-Supplemental_Figures_and_tables.pdf]

**Supplementary Table 1. Adverse Events Stratified by Severity and Attribution (presented as number of patients, n=12).**

| <b>Event</b>                   | <b><u>All Events</u></b> |                        | <b><u>Drug-Related Events</u></b> |                        |
|--------------------------------|--------------------------|------------------------|-----------------------------------|------------------------|
|                                | <b><u>All Grades</u></b> | <b><u>Grade ≥3</u></b> | <b><u>All Grades</u></b>          | <b><u>Grade ≥3</u></b> |
|                                | No. (%)                  | No. (%)                | No. (%)                           | No. (%)                |
| <b><u>Hematologic</u></b>      |                          |                        |                                   |                        |
| Anemia                         | 1(8)                     | 1(8)                   | 1(8)                              | 1(8)                   |
| Thrombocytopenia               | 1(8)                     | 1(8)                   | 1(8)                              | 1(8)                   |
| <b><u>Gastrointestinal</u></b> |                          |                        |                                   |                        |
| Abdominal pain                 | 1(8%)                    | 0                      | 0                                 | 0                      |
| Anorexia                       | 1(8)                     | 0                      | 1(8)                              | 0                      |
| AST elevation                  | 1(8)                     | 0                      | 1(8)                              | 0                      |
| Constipation                   | 2(17)                    | 0                      | 0                                 | 0                      |
| Diarrhea                       | 3(25)                    | 1(8)                   | 2(17)                             | 0                      |
| Dysgeusia                      | 1(8)                     | 0                      | 1(8)                              | 0                      |
| Mucositis oral                 | 1(8)                     | 1(8)                   | 1(8)                              | 1(8)                   |
| Nausea                         | 2(17)                    | 0                      | 2(17)                             | 0                      |
| Vomiting                       | 3(25)                    | 0                      | 3(25)                             | 0                      |
| Acute kidney injury            | 1(8)                     | 1(8)                   | 1(8)                              | 1(8)                   |
| <b><u>Infectious</u></b>       |                          |                        |                                   |                        |
| Sepsis                         | 1(8)                     | 1(8)                   | 1(8)                              | 1(8)                   |
| Skin infection                 | 1(8)                     | 0                      | 0                                 | 0                      |
| URI                            | 2(17)                    | 0                      | 2(17)                             | 0                      |
| <b><u>Neuropathy</u></b>       |                          |                        |                                   |                        |
| Peripheral sensory neuropathy  | 4(33)                    | 0                      | 3(25)                             | 0                      |
| <b><u>Other</u></b>            |                          |                        |                                   |                        |
| Arthralgia                     | 1(8)                     | 0                      | 0                                 | 0                      |
| Atrial fibrillation            | 1(8)                     | 1(8)                   | 0                                 | 0                      |
| Back pain                      | 2(17)                    | 0                      | 0                                 | 0                      |
| Chills                         | 1(8)                     | 0                      | 1(8)                              | 0                      |
| Dysarthria                     | 1(8)                     | 0                      | 1(8)                              | 0                      |
| Dyspnea                        | 2(17)                    | 1(8)                   | 0                                 | 1(8)                   |
| Edema limbs                    | 2(17)                    | 0                      | 1(8)                              | 0                      |
| Fatigue                        | 3(25)                    | 0                      | 2(17)                             | 0                      |
| Hypercalcemia                  | 1(8)                     | 1(8)                   | 0                                 | 0                      |
| Hyponatremia                   | 1(8)                     | 1(8)                   | 0                                 | 0                      |
| Hypotension                    | 1(8)                     | 1(8)                   | 1(8)                              | 1(8)                   |
| Hypothyroidism                 | 1(8)                     | 0                      | 0                                 | 0                      |
| Lymph node pain                | 1(8)                     | 1(8)                   | 0                                 | 0                      |
| Lymphedema                     | 1(8)                     | 0                      | 0                                 | 0                      |

|                                 |       |      |      |      |
|---------------------------------|-------|------|------|------|
| Pain in extremity               | 1(8)  | 0    | 0    | 0    |
| Pruritus                        | 2(17) | 0    | 0    | 0    |
| Rash acneiform                  | 2(17) | 0    | 1(8) | 0    |
| Rash maculopapular              | 2(17) | 1(8) | 1(8) | 1(8) |
| Dehydration                     | 1(8)  | 0    | 0    | 0    |
| Respiratory failure             | 1(8)  | 1(8) | 0    | 0    |
| Skin ulceration                 | 1(8)  | 0    | 1(8) | 0    |
| Supraventricular<br>tachycardia | 1(8)  | 1(8) | 1(8) | 1(8) |
| Thromboembolic event            | 1(8)  | 1(8) | 1(8) | 1(8) |

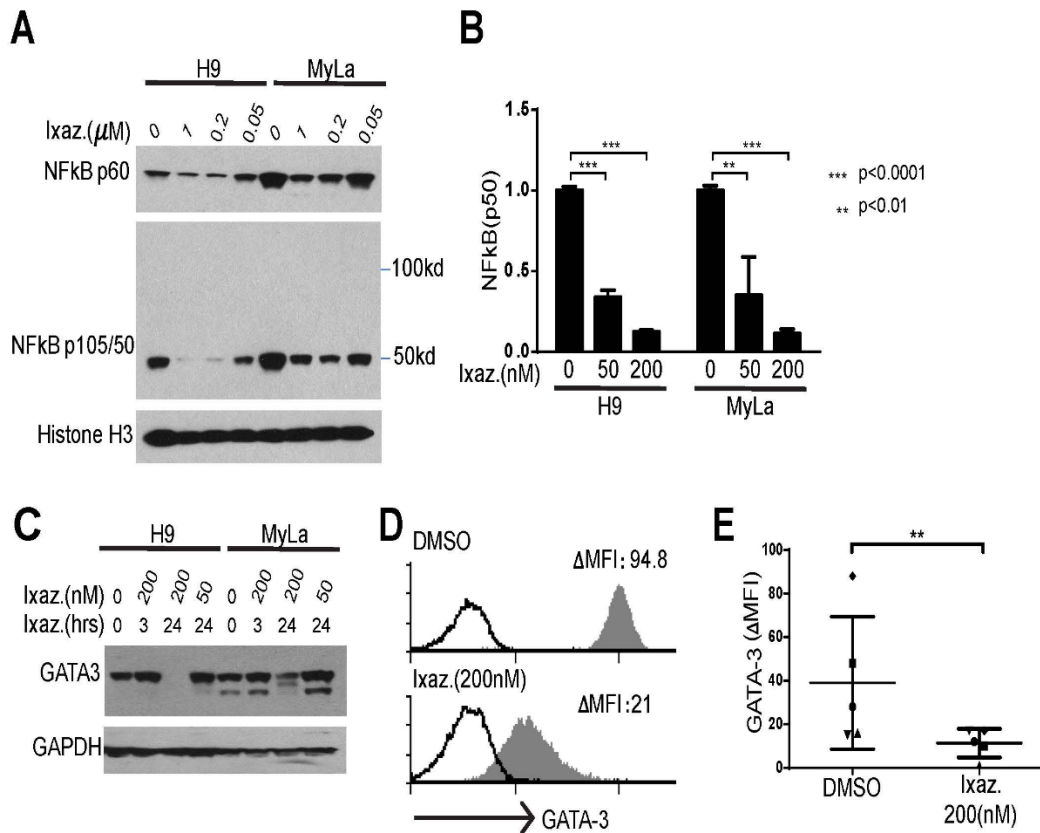

**Supplementary Figure 1.** Ixazomib inhibits NF- $\kappa$ B activation and GATA-3 expression. (A) NF- $\kappa$ B (p65 and p105/50) nuclear localization was determined in nuclear extracts obtained from H9 and MyLa cells treated overnight with ixazomib or vehicle control at the concentrations shown. A representative western blot is shown. (B) Nuclear NF- $\kappa$ B (p50) DNA binding was similarly determined by ELISA. (C) GATA-3 expression was determined in H9 and MyLa whole cell lysates after ixazomib treatment, as indicated. A representative western blot is shown. (D, E) GATA-3 expression was determined by intracellular flow cytometry (GATA-3, dark gray histogram; isotype control, open histogram) in purified primary T-cell lymphoma cells cultured with ixazomib (200 nM) or vehicle control for 24 hours. Representative histograms are shown in (D) and data independent patients (n=5) summarized in (E).

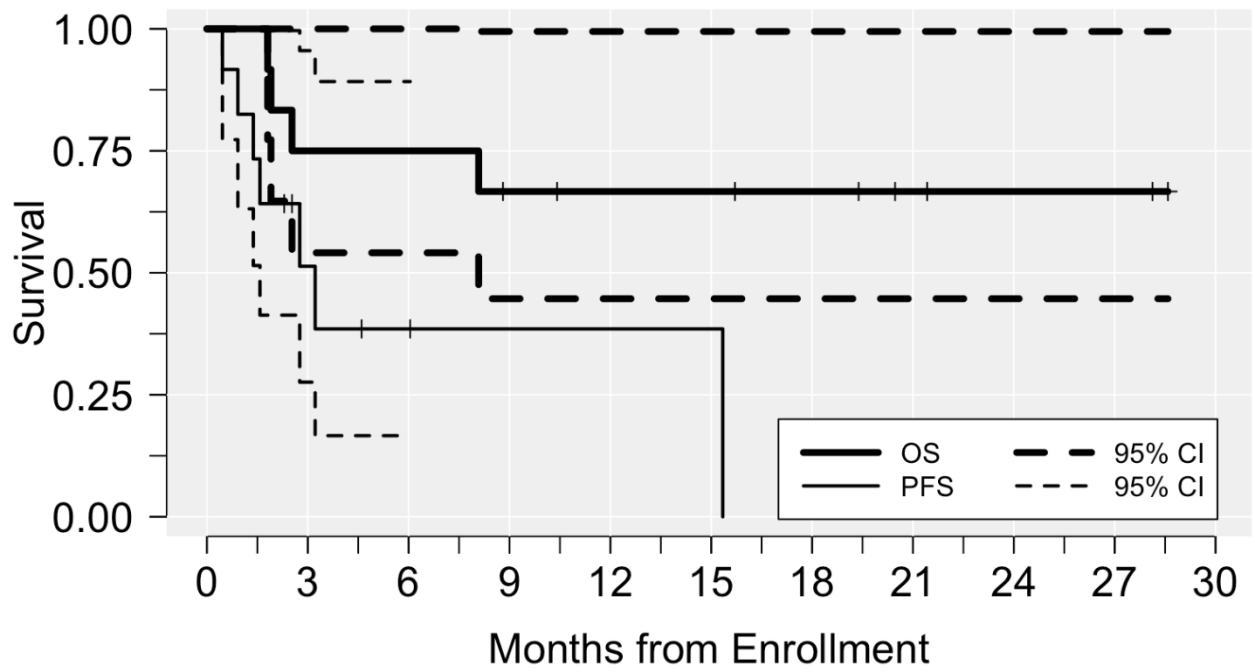

**Supplementary Figure 2.** Progression-free and overall survival.

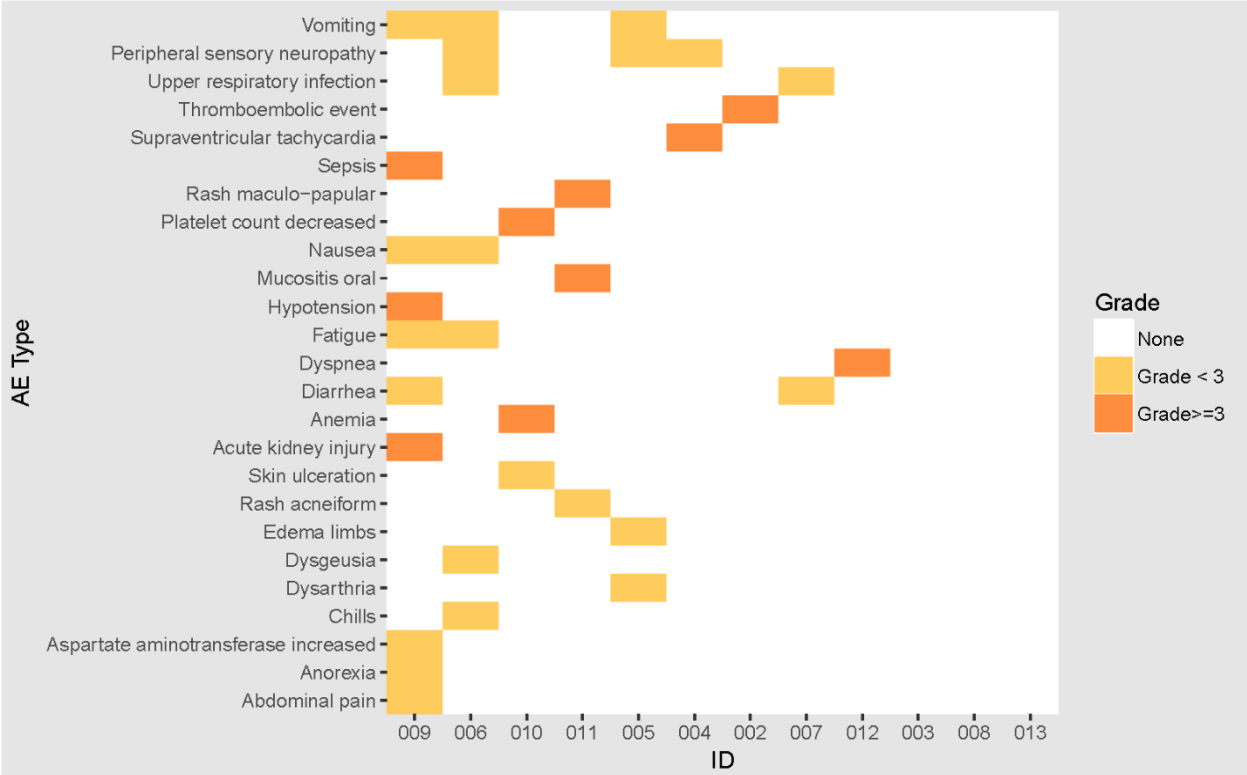

**Supplementary Figure 3.** Patient-specific adverse events stratified by severity.
